# Supplementary material for: Highly luminescent biocompatible CsPbBr3@SiO2 core–shell nanoprobes for bioimaging and drug delivery
Source: Royal Society of Chemistry journal article supplement (doi:10.1039/d0tb01833c), 2020-01-01
Supplement: d0tb01833c1.pdf [file d0tb01833c1.pdf]

## Electronic Supplementary Information (ESI)<sup>†</sup>

### Highly Luminescent Biocompatible CsPbBr<sub>3</sub>@SiO<sub>2</sub> Core–Shell Nanoprobes for Bioimaging and Drug Delivery

Pawan Kumar<sup>a</sup>, Madhumita Patel<sup>b</sup>, Chanho Park<sup>a</sup>, Hyowon Han<sup>a</sup>, Beomjin Jeong<sup>a</sup>, Hansol Kang<sup>a</sup>, Rajkumar Patel<sup>c</sup>, Won-Gun Koh<sup>b\*</sup> and Cheolmin Park<sup>a\*</sup>

<sup>a</sup> Department of Materials Science and Engineering, Yonsei University, 50 Yonsei-ro, Seodaemun-gu, Seoul 120-749, South Korea, E-mail: cmpark@yonsei.ac.kr

<sup>b</sup> Department of Chemical and Biomolecular Engineering, Yonsei University, 50 Yonsei-ro, Seodaemun-gu, Seoul 120-749, South Korea. E-mail: wongun@yonsei.ac.kr

<sup>c</sup> Energy & Environmental Science and Engineering (ESEE), Integrated Science and Engineering Division (ISED), Underwood International College, Yonsei University, 85 Songdogwahak-ro, Yeonsu-gu, Incheon 21983, South Korea 21938.

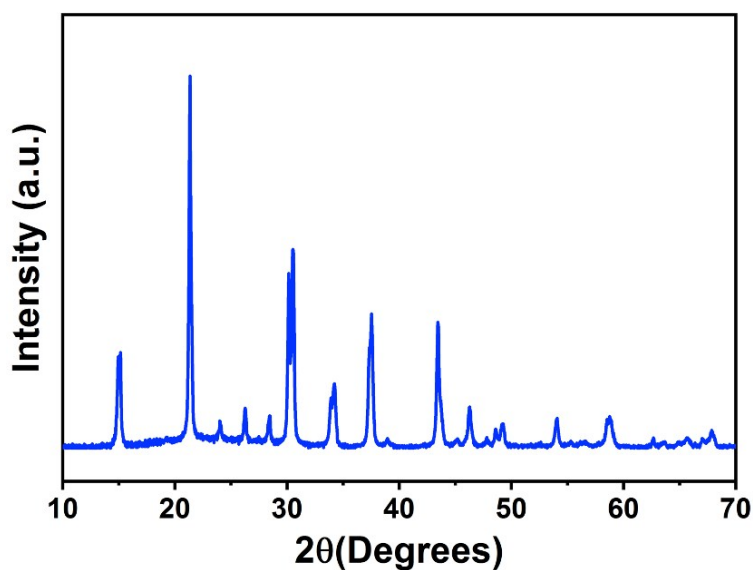

**Fig. S1** XRD Pattern of CsPbBr<sub>3</sub>@SiO<sub>2</sub> core–shell PNCs.

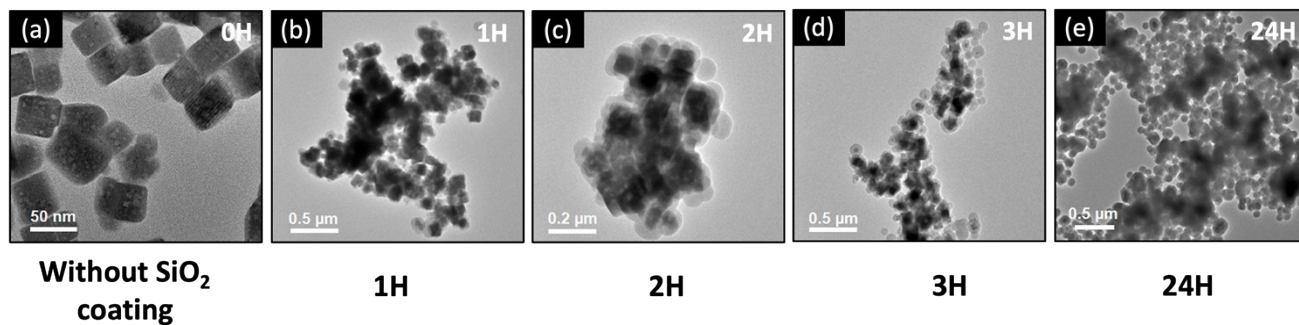

**Fig. S2** TEM images of CsPbBr<sub>3</sub> PNCs (a) and CsPbBr<sub>3</sub>@SiO<sub>2</sub> core-shell PNCs (b-e) at various reaction times 1, 2, 3, and 24 h, respectively

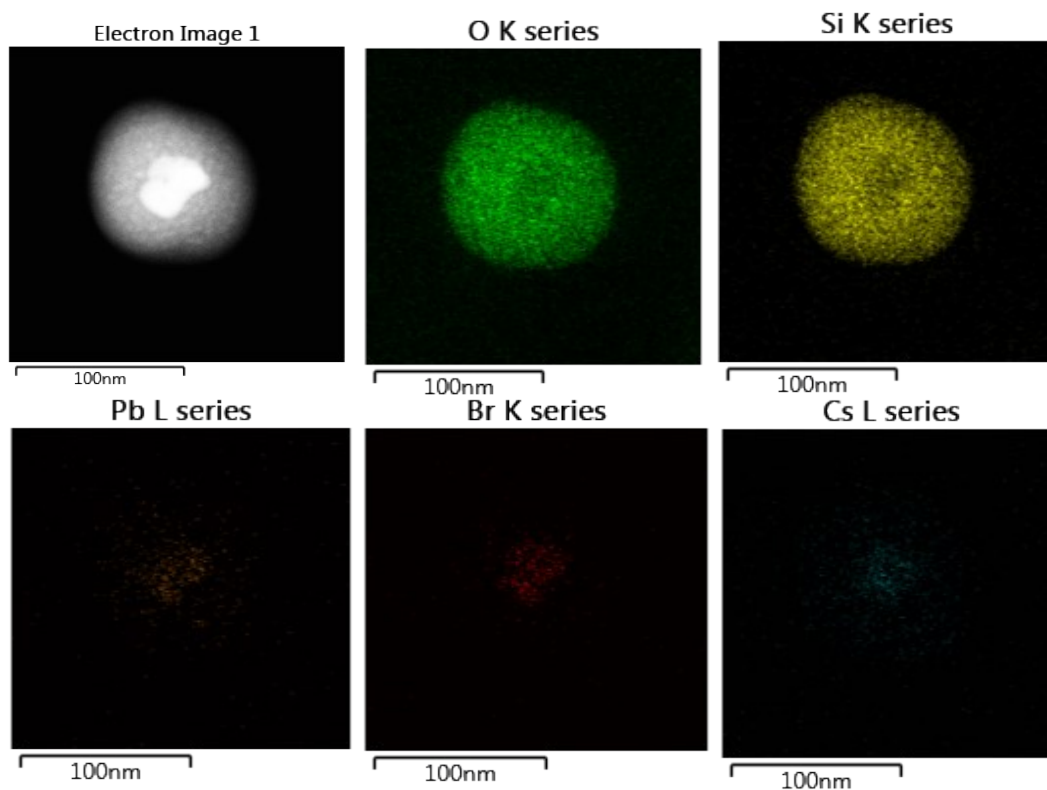

**Fig. S3** The EDS mapping of CsPbBr<sub>3</sub>@SiO<sub>2</sub> core-shell PNCs.

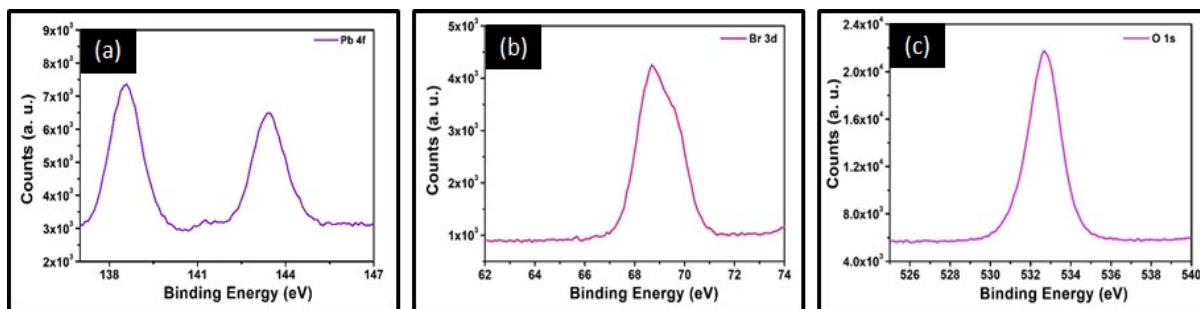

**Fig. S4** X-ray photoelectron spectra of (a) Pb4f, (b) Br3d, and (c) O1s.

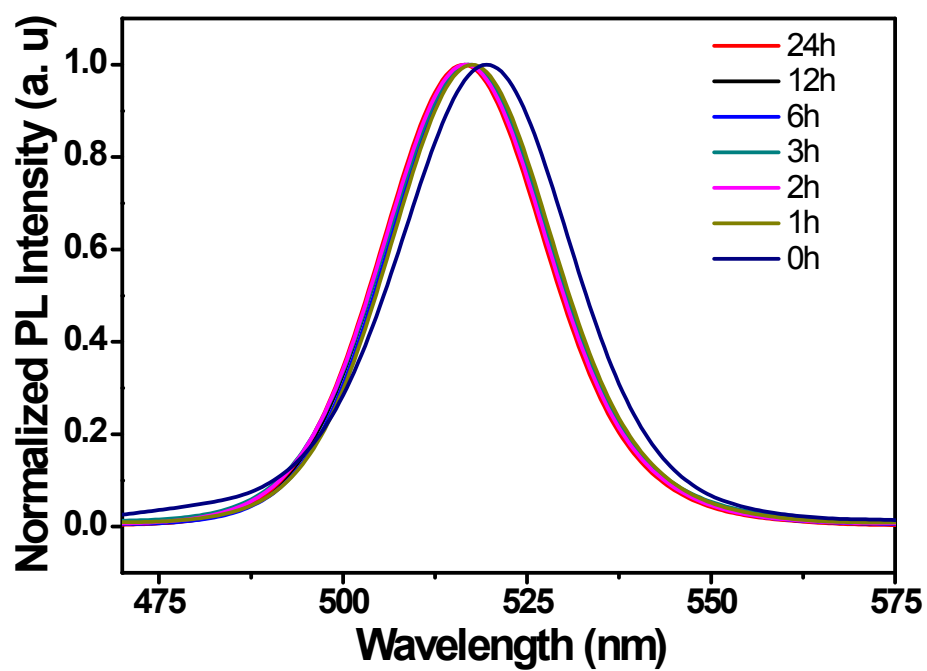

**Fig. S5** Normalized photoluminescence emission spectra of CsPbBr<sub>3</sub>@SiO<sub>2</sub> core-shell PNCs synthesized at different reaction such as 1, 2, 3, 6, 12, 24 hours.

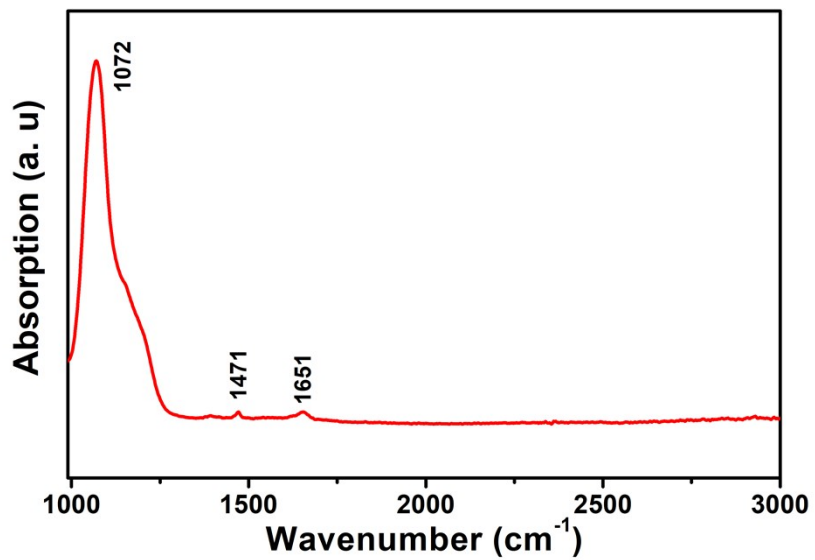

**Fig. S6** The FTIR spectrum of CsPbBr<sub>3</sub>@SiO<sub>2</sub>-24H core-shell PNCs.

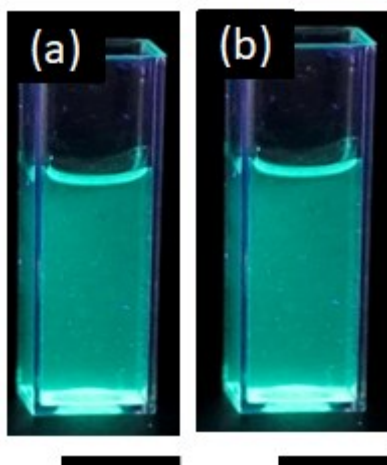

**Fig. S7** (a & b) The photograph of CsPbBr<sub>3</sub>@SiO<sub>2</sub>-24H core-shell PNCs dispersed in water in UV light after 2 and 24 hours, respectively. The scale bars (a) and (b) are 1 cm.

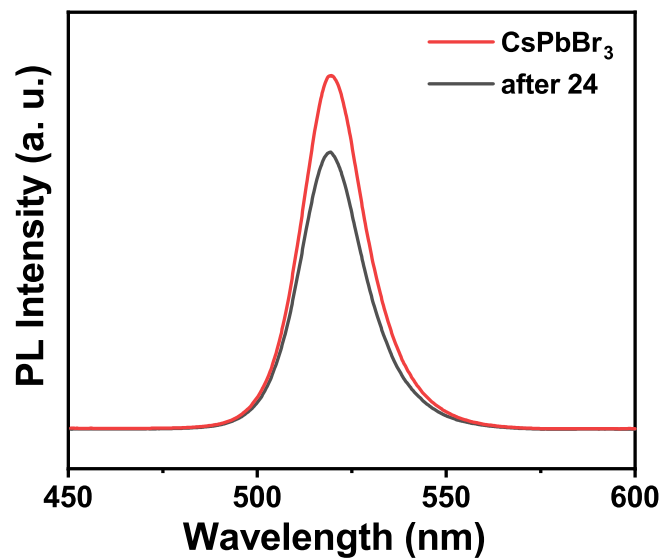

**Fig. S8** The PL emission spectra of CsPbBr<sub>3</sub>@SiO<sub>2</sub>\_24H core-shell PNCs dispersed in water after dispersion and 24 hours, respectively.

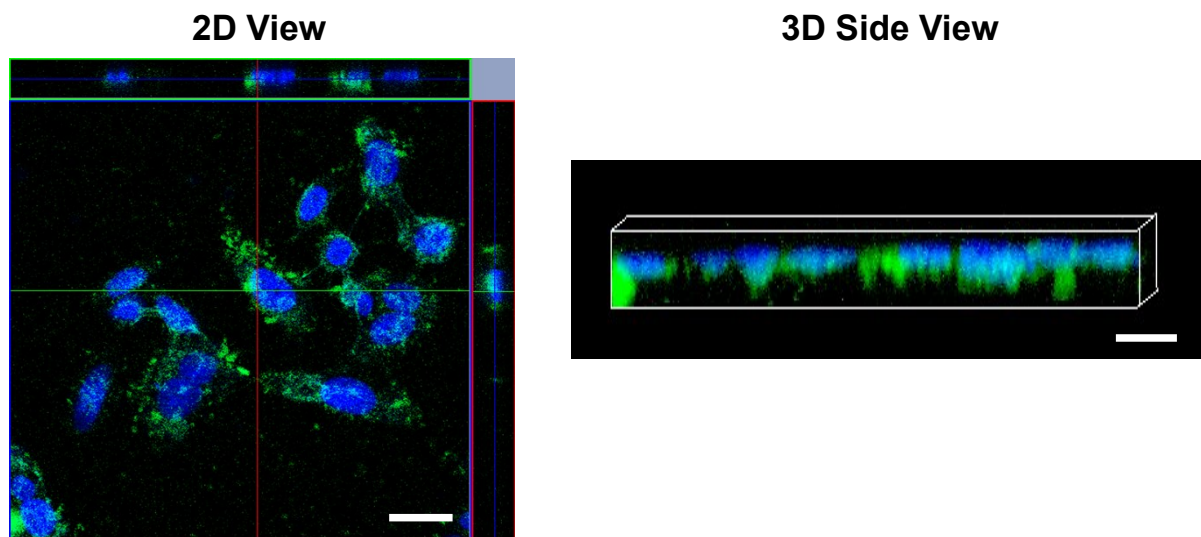

**Fig. S9** Z-stack image acquired by confocal microscopy, of HeLa cells. Cell nuclei (DAPI) are shown in blue and nanocrystals in green. Scale bar: 10  $\mu$ m.

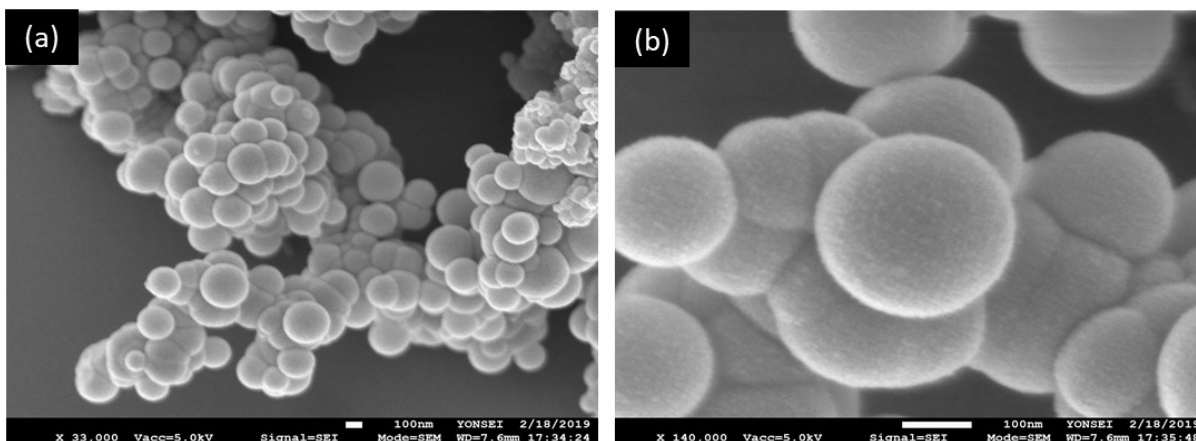

Fig. S10 (a) and (b) the SEM and high resolution images of CsPbBr<sub>3</sub>@SiO<sub>2</sub>\_24H nanocrystals.

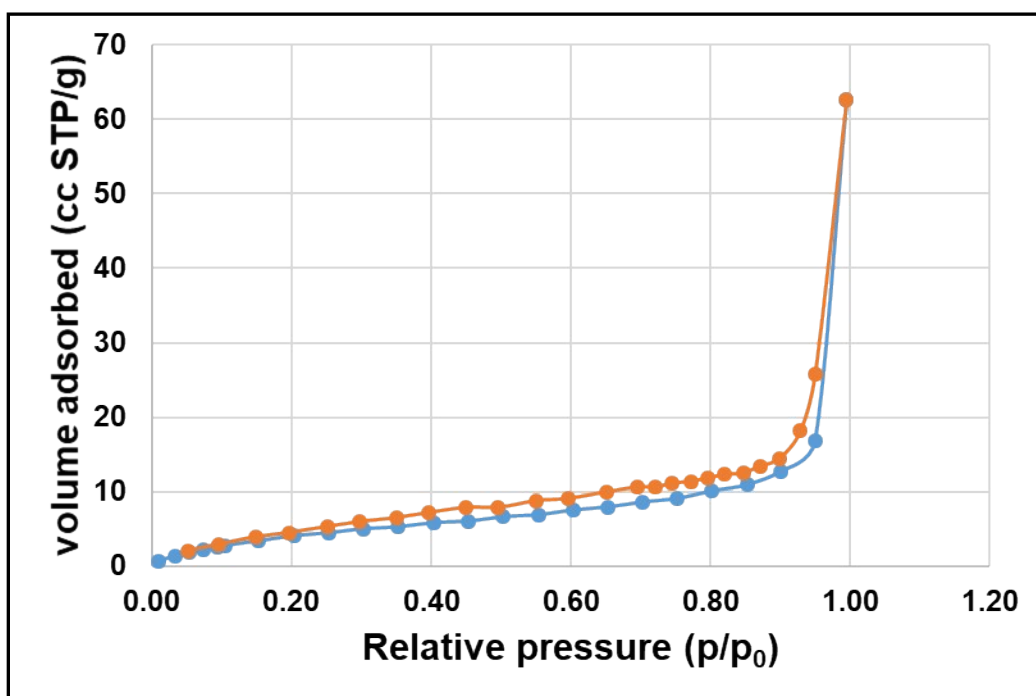

Fig. S11 Adsorption-desorption isotherm of CsPbBr<sub>3</sub>@SiO<sub>2</sub>\_24H core shell PNCs.

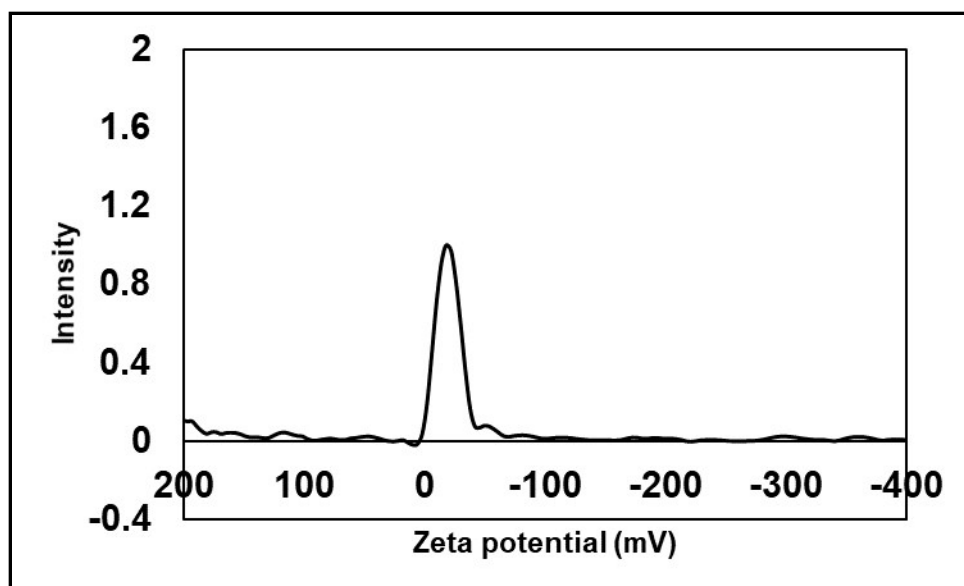

**Fig. S12** Zeta ( $\zeta$ )-potential of CsPbBr<sub>3</sub>@SiO<sub>2</sub>\_24H core shell PNCs.

| Sample                                | BET surface area (m <sup>2</sup> g) | Pore diameter (nm) | Pore volume (cc/g) |
|---------------------------------------|-------------------------------------|--------------------|--------------------|
| CsPbBr <sub>3</sub> @SiO <sub>2</sub> | 14.259                              | 3.043              | 0.094              |

**Tab. S1** Parameters obtained for of CsPbBr<sub>3</sub>@SiO<sub>2</sub>\_24H core shell PNCs from BET.

| Matrix                                                                      | Structure          | Emission (nm) | Excitation (nm) | Bio-medical application     | Ref. |
|-----------------------------------------------------------------------------|--------------------|---------------|-----------------|-----------------------------|------|
| CdS:Cu                                                                      | Nanoparticle       | 565           | 405             | bio-imaging                 | 1    |
| NaYF <sub>4</sub> :Yb,Tm@SiO <sub>2</sub> -PEG                              | Core-shell         | 365           | 980 nm          | Drug delivery               | 2    |
| Carbon dots                                                                 | Quantum dots       | 410 to 504    | 280 to 460      | bio-imaging                 | 3    |
| Gold Nanorods/Polypyrrole/m-SiO <sub>2</sub> (GNRs/PPy/m-SiO <sub>2</sub> ) | Core-shell         | --            | --              | Drug delivery               | 4    |
| Fe3O4@SiO <sub>2</sub>                                                      | Mesoporous Spheres | --            | --              | Drug delivery               | 5    |
| CsPbBr <sub>3</sub> /CsPb2Br <sub>5</sub>                                   | Core-shell         | 520           | 365             | bio-imaging                 | 6    |
| CsPbBr <sub>3</sub> @PMMA                                                   | Nanospheres        | 510           | 365             | bio-imaging                 | 7    |
| MoS <sub>2</sub> /WS <sub>2</sub>                                           | Quantum Dots       | 463           | 390             | bio-imaging                 | 8    |
| MoS <sub>2</sub>                                                            | Quantum Dots       | 414           | 243             | bio-imaging                 | 9    |
| CsPbX <sub>3</sub> @MHSs                                                    | Micelles           | 514           | 365             | bio-imaging                 | 10   |
| C-Dots                                                                      | Quantum Dots       | 05 to 565     | 600 to 800      | bio-imaging                 | 11   |
| (CsPbBr <sub>3</sub> @SiO <sub>2</sub> )<br>Our Case                        | Core-shell         | 514           | 374             | bio-imaging & Drug delivery |      |

**Tab. S2** Characteristics of PNCs used for bio-medical application.

## References

1. T. Xuan, S. Wang, X. Wang, J. Liu, J. Chen, H. Li, L. Pan and Z. Sun, *Chem. Commun. (Camb)*, 2013, **49**, 9045-9047.
2. P. Alonso-Cristobal, O. Oton-Fernandez, D. Mendez-Gonzalez, J. F. Díaz, E. Lopez-Cabarcos, I. Barasoain and J. Rubio-Retama, *ACS Appl. Mater. Interfaces*, 2015, **7**, 14992-14999.
3. C. Yu, T. Xuan, Y. Chen, Z. Zhao, Z. Sun and H. Li, *J. Mater. Chem. C*, 2015, **3**, 9514-9518.
4. J. Wang, J. Han, C. Zhu, N. Han, J. Xi, L. Fan and R. Guo, *Langmuir*, 2018, **34**, 14661-14669.
5. Y. Zhu, T. Ikoma, N. Hanagata and S. Kaskel, *Small*, 2010, **6**, 471-478.
6. S. Lou, Z. Zhou, T. Xuan, H. Li, J. Jiao, H. Zhang, R. Gautier and J. Wang, *ACS Appl. Mater. Interfaces*, 2019, **11**, 24241-24246.
7. Y. Wang, L. Varadi, A. Trinchi, J. Shen, Y. Zhu, G. Wei and C. Li, *Small*, 2018, **14**, e1803156.
8. S. Xu, D. Li and P. Wu, *Adv. Funct. Mater.*, 2015, **25**, 1127-1136.
9. W. Dai, H. Dong, B. Fugetsu, Y. Cao, H. Lu, X. Ma and X. Zhang, *Small*, 2015, **11**, 4158-4164.
10. H. Zhang, X. Wang, Q. Liao, Z. Xu, H. Li, L. Zheng and H. Fu, *Adv. Funct. Mater.*, 2017, **27**, 1604382.
11. B. Kong, A. Zhu, C. Ding, X. Zhao, B. Li and Y. Tian, *Adv. Mater.*, 2012, **24**, 5844-5848.
